# Supplementary material for: Clinically Relevant Dose of Pemafibrate, a Novel Selective Peroxisome Proliferator-Activated Receptor α Modulator (SPPARMα), Lowers Serum Triglyceride Levels by Targeting Hepatic PPARα in Mice
Source: MDPI journal article supplement (doi:10.3390/biomedicines10071667), 2022-07-11

## **Supporting information**

### **Index of supplementary tables and figure:**

**Supplementary Table S1.** Primer pairs used for qPCR analysis.

**Supplementary Table S2.** Primary antibodies used for western blot analysis.

**Supplementary Table S3.** Biochemical analysis of serum and liver.

**Supplementary Figure S1.** PEM does not affect FA/TG metabolism in eWAT.

**Supplementary Figure S2.** PEM does not affect FA/TG metabolism in BAT.

**Supplementary Figure S3.** Photomicrographs of hematoxylin and eosin-stained heart and kidney tissue.

**Supplementary Figure S4.** Clinically relevant dose of PEM activates hepatic PPAR $\alpha$  without enhancing PPAR $\beta$  or PPAR $\gamma$ .

**Supplementary Figure S5.** Full-length blots

**Supplementary Table S1. Primer pairs used for qPCR analysis.**

| <b>Gene</b>     | <b>Accession #</b> | <b>Primer sequence (5'-3')</b>                                        |
|-----------------|--------------------|-----------------------------------------------------------------------|
| <i>18S rRNA</i> | NR_003278          | F 5'-CACGGACAGGATTGACAGATTG-3'<br>R 5'-CAGACAAATCGCTCCACCAA-3'        |
| <i>Acaa1</i>    | NM_130864          | F 5'-TCTACGGTCAACAGACAGTGTTC-3'<br>R 5'-GGCCATGCCAATGTCATAAGA-3'      |
| <i>Acaca</i>    | NM_133360          | F 5'-GGGCACAGACCGTGGTAGTT-3'<br>R 5'-CAGGATCAGCTGGGATACTGAGT-3'       |
| <i>Acadl</i>    | NM_007381          | F 5'-AGAAACATGGCGGCATTG-3'<br>R 5'-CAATATCTGAGTGGAGGCTGAAG-3'         |
| <i>Acadm</i>    | NM_007382          | F 5'-TGCTTTTGATAGAACCAGACCTACAGT-3'<br>R 5'-CTTGGTGCTCCACTAGCAGCTT-3' |
| <i>Acads</i>    | NM_007383          | F 5'-CTCCACAGCTAACCTCATCTTTG-3'<br>R 5'-GGGTTTGCATGGCTATTTTG-3'       |
| <i>Acadvl</i>   | NM_017366          | F 5'-GCGTGTGCTCCGAGATATTC-3'<br>R 5'-CCAGTGAGTTCCTTTCCTTTG-3'         |
| <i>Acox1</i>    | NM_015729          | F 5'-TGGTATGGTGTGCTACTTGAATGAC-3'<br>R 5'-AATTTCTACCAATCTGGCTGCAC-3'  |
| <i>Acs11</i>    | NM_007981          | F 5'-TCCTACGGCAGTGATCTGGTG-3'<br>R 5'-GGTTGCCTGTAGTTCCACTTGTG-3'      |
| <i>Apob</i>     | NM_009693          | F 5'-TCACCCCCGGGATCAAG-3'<br>R 5'-TCCAAGGACACAGAGGGCTTT-3'            |
| <i>Cd36</i>     | NM_007643          | F 5'-CCAAATGAAGATGAGCATAGGACAT-3'<br>R 5'-GTTGACCTGCAGTCGTTTTGC-3'    |
| <i>Ces1d</i>    | NM_053200          | F 5'-TGGTATTTGGTGTCCCATCA-3'<br>R 5'-GCTTGGGCGATACTCAAAC-3'           |
| <i>Cpt1</i>     | NM_013495          | F 5'-TGGCATCATCACTGGTGTGTT-3'<br>R 5'-GGTCCGATTGATCTTTGCAATC-3'       |
| <i>Cpt2</i>     | NM_009949          | F 5'-ATCGTACCCACCATGCACTAC-3'<br>R 5'-CTGTCATTCAAGAGAGGCTTCTG-3'      |
| <i>Dgat1</i>    | NM_010046          | F 5'-CTGCTACGACGAGTTCTTGAGA-3'<br>R 5'-GATAGTAGGGACCATCCACTGTTG-3'    |
| <i>Dgat2</i>    | NM_026384          | F 5'-GCTTCGCGAGTACCTGATGT-3'<br>R 5'-CACCACGATGATGATAGCATTG-3'        |
| <i>Ehhadh</i>   | NM_023737          | F 5'-CGATACTCTTCCCCCACTACCA-3'<br>R 5'-CAGTTACCAACAACGACTCCAATC-3'    |
| <i>Fabp1</i>    | NM_017399          | F 5'-GCAGAGCCAGGAGAACTTTGAG-3'<br>R 5'-TTTGATTTTCTTCCCTTCATGCA-3'     |
| <i>Fasn</i>     | NM_007988          | F 5'-ATCCTGGAACGAGAACACGATCT-3'<br>R 5'-AGAGACGTGTCACTCCTGGACTT-3'    |

|                 |           |                                                                      |
|-----------------|-----------|----------------------------------------------------------------------|
| <i>Hsl</i>      | NM_010719 | F 5'-GAGCGCTGGAGGAGTGTTTT-3'<br>R 5'-TGATGCAGAGATTCCCACCTG-3'        |
| <i>Lipc</i>     | NM_008280 | F 5'-ACGGGAAGAACAAGATTGGAAG-3'<br>R 5'-CGTTCCCTCAAACATAGGGC-3'       |
| <i>Lpl</i>      | NM_008509 | F 5'-CGCTCCATTCATCTCTTCATT-3'<br>R 5'-GGCAGAGCCCTTTCTCAAAGG-3'       |
| <i>Mttp</i>     | NM_008642 | F 5'-GAGCGGTCTGGATTTACAACG-3'<br>R 5'-GTAGGTAGTGACAGATGTGGCTTTTG-3'  |
| <i>Ppargc1a</i> | NM_008904 | F 5'-GACTCAGTGTCACCACCGAAATC-3'<br>R 5'-GACCTGTGTGCGAGAAAAGGATCTT-3' |
| <i>Pnpla2</i>   | NM_025802 | F 5'-CGTGTTTCAGACGGAGAGAAC-3'<br>R 5'-TTGGAGGGTAGGAGGAATGAG-3'       |
| <i>Slc25a20</i> | NM_020520 | F 5'-GAGCCGAAACCCATCAGTCC-3'<br>R 5'-CAGTCGGACCTTGACCGTG-3'          |
| <i>Slc27a1</i>  | NM_011977 | F 5'-ACCACCGGGCTTCCTAAGG-3'<br>R 5'-CTGTAGGAATGGTGGCCAAAG-3'         |
| <i>Ucp1</i>     | NM_009463 | F 5'-AGGATGGTGAACCCGACAAC-3'<br>R 5'-GGCCTTCACCTTGGATCTGA-3'         |

---

F, forward sequence; R, reverse sequence.

*Acaa1*, acetyl-CoA acyltransferase 1

*Acaca*, acetyl-CoA carboxylase  $\alpha$

*Acadl*, long-chain acyl-CoA dehydrogenase

*Acadm*, medium-chain acyl-CoA dehydrogenase

*Acads*, short-chain acyl-CoA dehydrogenase

*Acadvl*, very long-chain acyl-CoA dehydrogenase

*Acox1*, acyl-CoA oxidase 1

*Acs1l*, long chain acyl-CoA synthase

*Apob*, apolipoprotein B

*Cd36*, fatty acid translocase

*Ces1d*, carboxylesterase 1d

*Cpt1*, carnitine palmitoyl transferase 1

*Cpt2*, carnitine palmitoyl transferase 2

*Dgat1*, diacylglycerol acyltransferase 1

*Dgat2*, diacylglycerol acyltransferase 2

*Ehhadh*, enoyl-Coenzyme A, hydratase/3-hydroxyacyl Coenzyme A dehydrogenase

*Fabp1*, fatty acid binding protein 1

*Fasn*, fatty acid synthase

*Hsl*, hormone-sensitive lipase

*Lipc*, hepatic lipase

*Lpl*, lipoprotein lipase

*Mttp*, microsomal triglyceride transfer protein

*Ppargc1a*, peroxisome proliferator-activated receptor gamma coactivator 1  
alpha

*Pnpla2*, patatin-like phospholipase domain containing 2

*Slc25a20*, mitochondrial carnitine/acylcarnitine translocase

*Slc27a1*, fatty acid transport protein 1

*Ucp1*, uncoupling protein 1

**Supplementary Table S2. Primary antibodies used for western blot analysis.**

| Protein name                                        | Abbreviation  | Manufacturer                                | Catalog # | Dilution |
|-----------------------------------------------------|---------------|---------------------------------------------|-----------|----------|
| 4-hydroxy-nonenal modified protein                  | 4HNE          | JalCA<br>(Shizuoka, Japan)                  | #MHN-020P | 1:100    |
| Acetyl-CoA carboxylase alpha                        | ACC $\alpha$  | Santa Cruz<br>Biotechnology<br>(Dallas, TX) | #sc-30212 | 1:200    |
| Actin, cytoplasmic 1                                | ACTB          | Abcam<br>(Cambridge, MA)                    | #ab8227   | 1:1000   |
| Cluster of differentiation 36                       | CD36          | Biotechnology<br>(Dallas, TX)               | #sc-9154  | 1:200    |
| Fatty acid synthase                                 | FAS           | Biotechnology<br>(Dallas, TX)               | #sc-16147 | 1:200    |
| Histone H1                                          | Histone H1    | Santa Cruz<br>Biotechnology<br>(Dallas, TX) | #sc-10806 | 1:200    |
| Microsomal TG transfer protein                      | MTP           | Santa Cruz<br>Biotechnology<br>(Dallas, TX) | #sc-33116 | 1:200    |
| Peroxisome proliferator-activated receptor $\alpha$ | PPAR $\alpha$ | Santa Cruz<br>Biotechnology<br>(Dallas, TX) | #sc-9000  | 1:200    |

Other antibodies used were described previously (Aoyama et al., J Biol Chem 1998).

**Supplementary Table S3. Biochemical analysis of serum and liver.**

**Serum biochemical characteristics**

| <b>Item</b>             | <b>Control group</b><br>(n=8) | <b>PEM-0.1 group</b><br>(n=10) | <b>PEM-0.3 group</b><br>(n=9) |
|-------------------------|-------------------------------|--------------------------------|-------------------------------|
| Glucose (mg/dL)         | 205.8 ± 55.90                 | 212.93 ± 75.06                 | 174.96 ± 35.61                |
| Insulin (ng/dL)         | 0.37 ± 0.13                   | 0.30 ± 0.12                    | 0.19 ± 0.14                   |
| HMW adiponectin (mg/dL) | 129.86 ± 93.27                | 107.36 ± 67.91                 | 104.53 ± 58.63                |

**Liver biochemical characteristics**

| <b>Item</b>     | <b>Control group</b><br>(n=8) | <b>PEM-0.1 group</b><br>(n=10) | <b>PEM-0.3 group</b><br>(n=9) |
|-----------------|-------------------------------|--------------------------------|-------------------------------|
| PL (mg/g liver) | 48.03 ± 10.85                 | 43.19 ± 9.48                   | 47.23 ± 14.19                 |

Values are expressed as the mean ± SD.

### Supplementary Figure S1. PEM does not affect FA/TG metabolism in eWAT.

(A) Representative photomicrographs of hematoxylin and eosin-stained eWAT sections. Scale bar= 50  $\mu$ m. (B-D) Hepatic mRNA levels of genes related to FA uptake (*Cd36*), FA synthesis (*Fasn* and *Acaca*), TG synthesis (*Dgat1* and *Dgat2*), TG decomposition (*Lpl*, *Ces1b*, *Hsl* and *Pnpla2*), and fat burning (*Ppargc1a*) were quantified by qPCR, normalized to that of 18s ribosomal RNA levels, and expressed as values relative to those of control mice. Data are expressed as the mean  $\pm$  SD. Con, vehicle-treated mice; PEM-0.1, pemafibrate-treated mice at a clinically relevant dose (0.1 mg/kg/day); PEM-0.3, pemafibrate-treated mice at a relatively high dose (0.3 mg/kg/day).

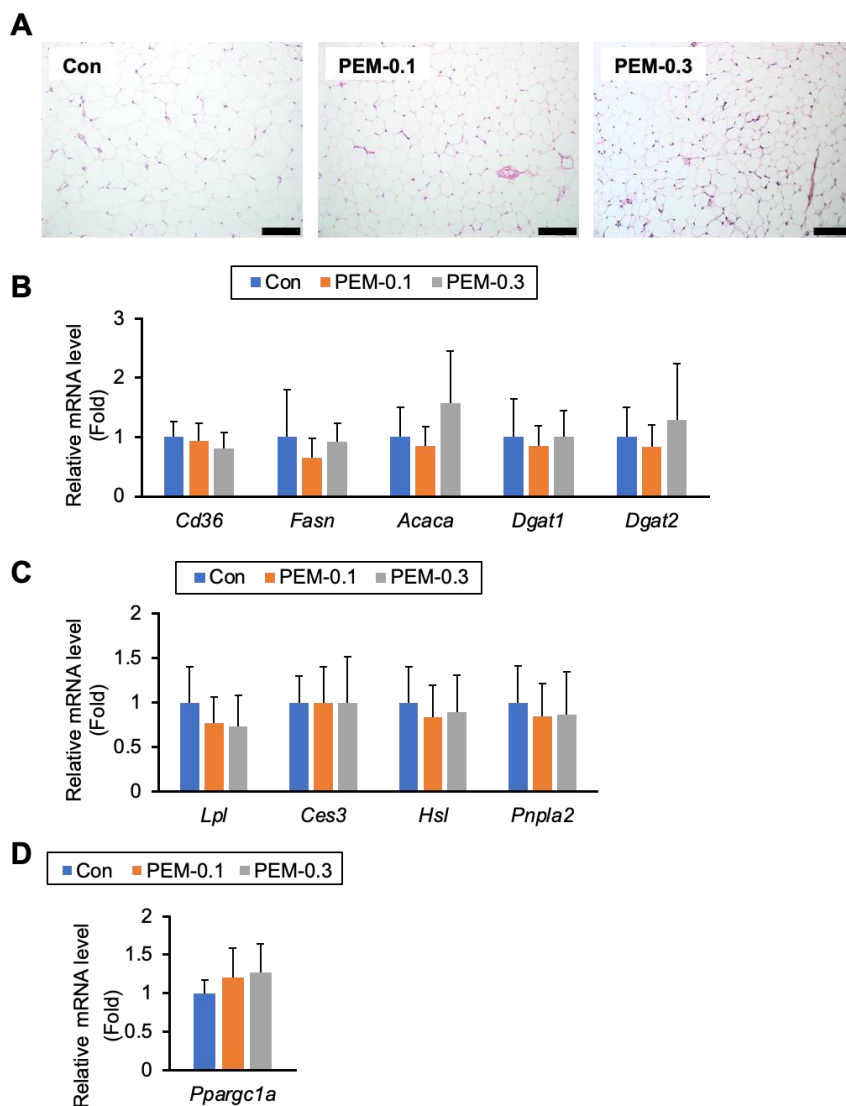

## Supplementary Figure S2. PEM does not affect FA/TG metabolism in BAT.

(A) Representative photomicrographs of hematoxylin and eosin-stained BAT sections. Scale bar= 50  $\mu$ m. (B-D) Hepatic mRNA levels of genes related to FA uptake (*Cd36*), intracellular FA transport (*Slc27a1*), TG decomposition (*Lpl* and *Hsl*), and fat burning (*Ppargc1a* and *Ucp1*) were quantified by qPCR, normalized to that of 18s ribosomal RNA levels, and expressed as values relative to those of control mice. Data are expressed as the mean  $\pm$  SD. Con, vehicle-treated mice; PEM-0.1, pemaifibrate-treated mice at a clinically relevant dose (0.1 mg/kg/day); PEM-0.3, pemaifibrate-treated mice at a relatively high dose (0.3 mg/kg/day).

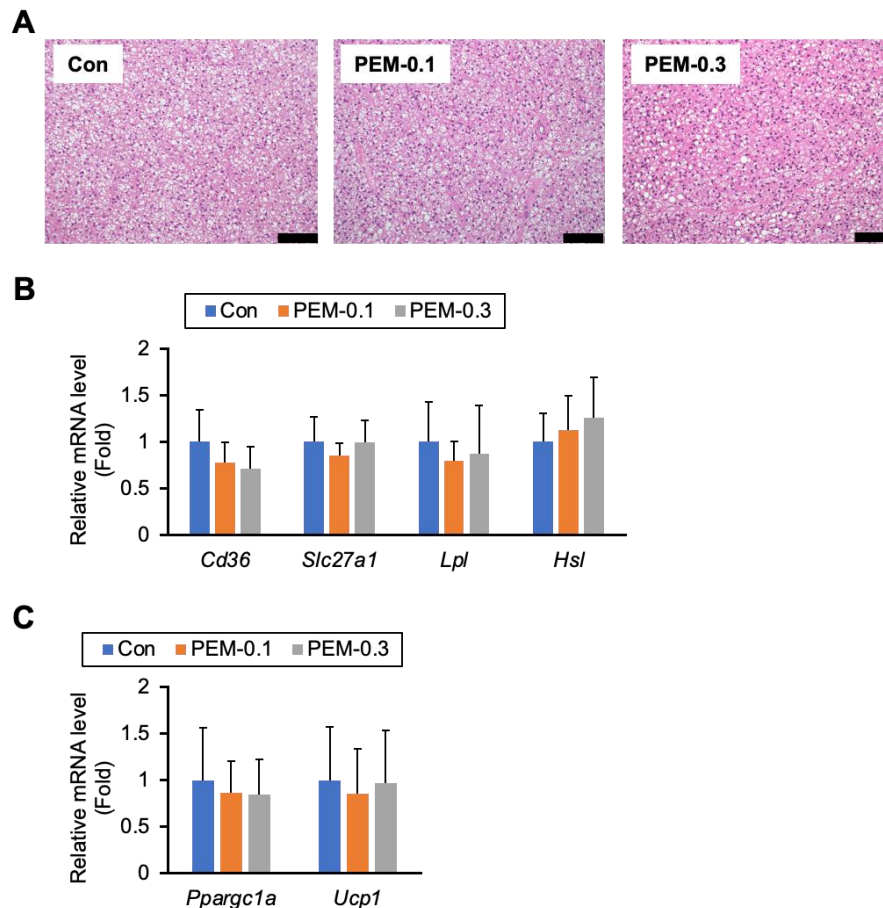



**Supplementary Figure S3. Representative photomicrographs of hematoxylin and eosin-stained heart (A) and kidney (B) tissue.**

Scale bar= 50  $\mu$ m. Con, vehicle-treated mice; PEM-0.1, pemaibrate-treated mice at a clinically relevant dose (0.1 mg/kg/day); PEM-0.3, pemaibrate-treated mice at a relatively high dose (0.3 mg/kg/day).

**A**

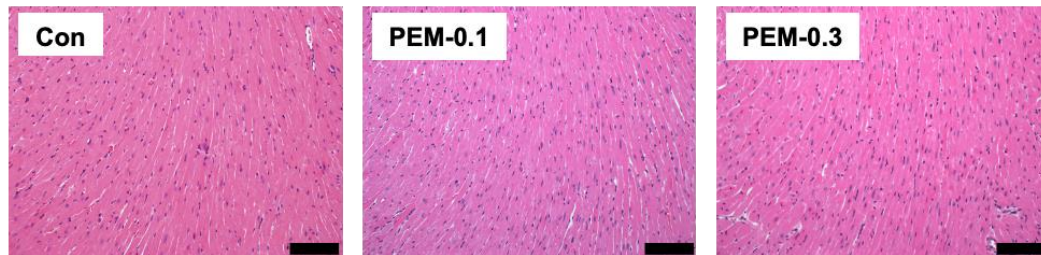

**B**

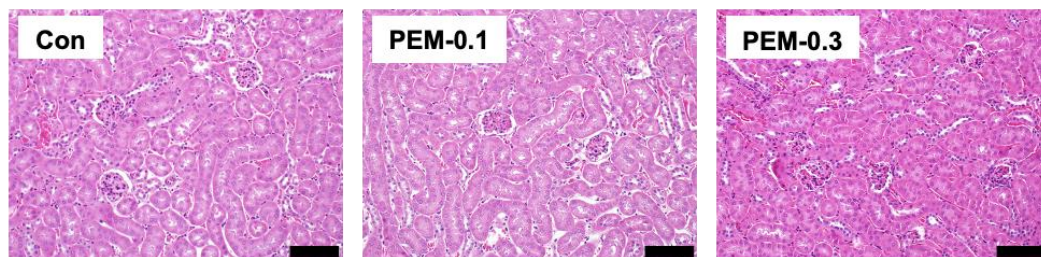

**Supplementary Figure S4. Clinically relevant dose of PEM activates hepatic PPAR $\alpha$  without enhancing PPAR $\beta$  or PPAR $\gamma$ .**

Immunoblot analysis of PPAR $\beta$  and PPAR $\gamma$ . The band of histone H1 was used as a loading control. Data are expressed as the mean  $\pm$  SD. Con, vehicle-treated mice; PEM-0.1, pemafibrate-treated mice at a clinically relevant dose (0.1 mg/kg/day); PEM-0.3, pemafibrate-treated mice at a relatively high dose (0.3 mg/kg/day).

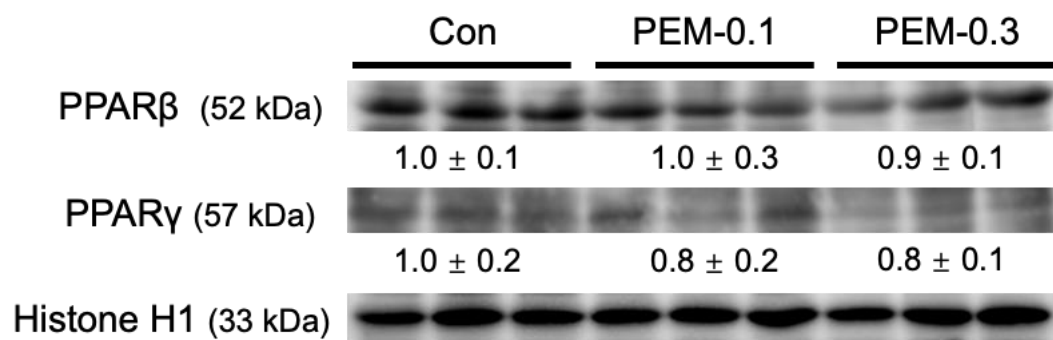

## Supplementary Figure S5. Full-length blots.

The protein bands inside the black dotted lines are used in this paper.

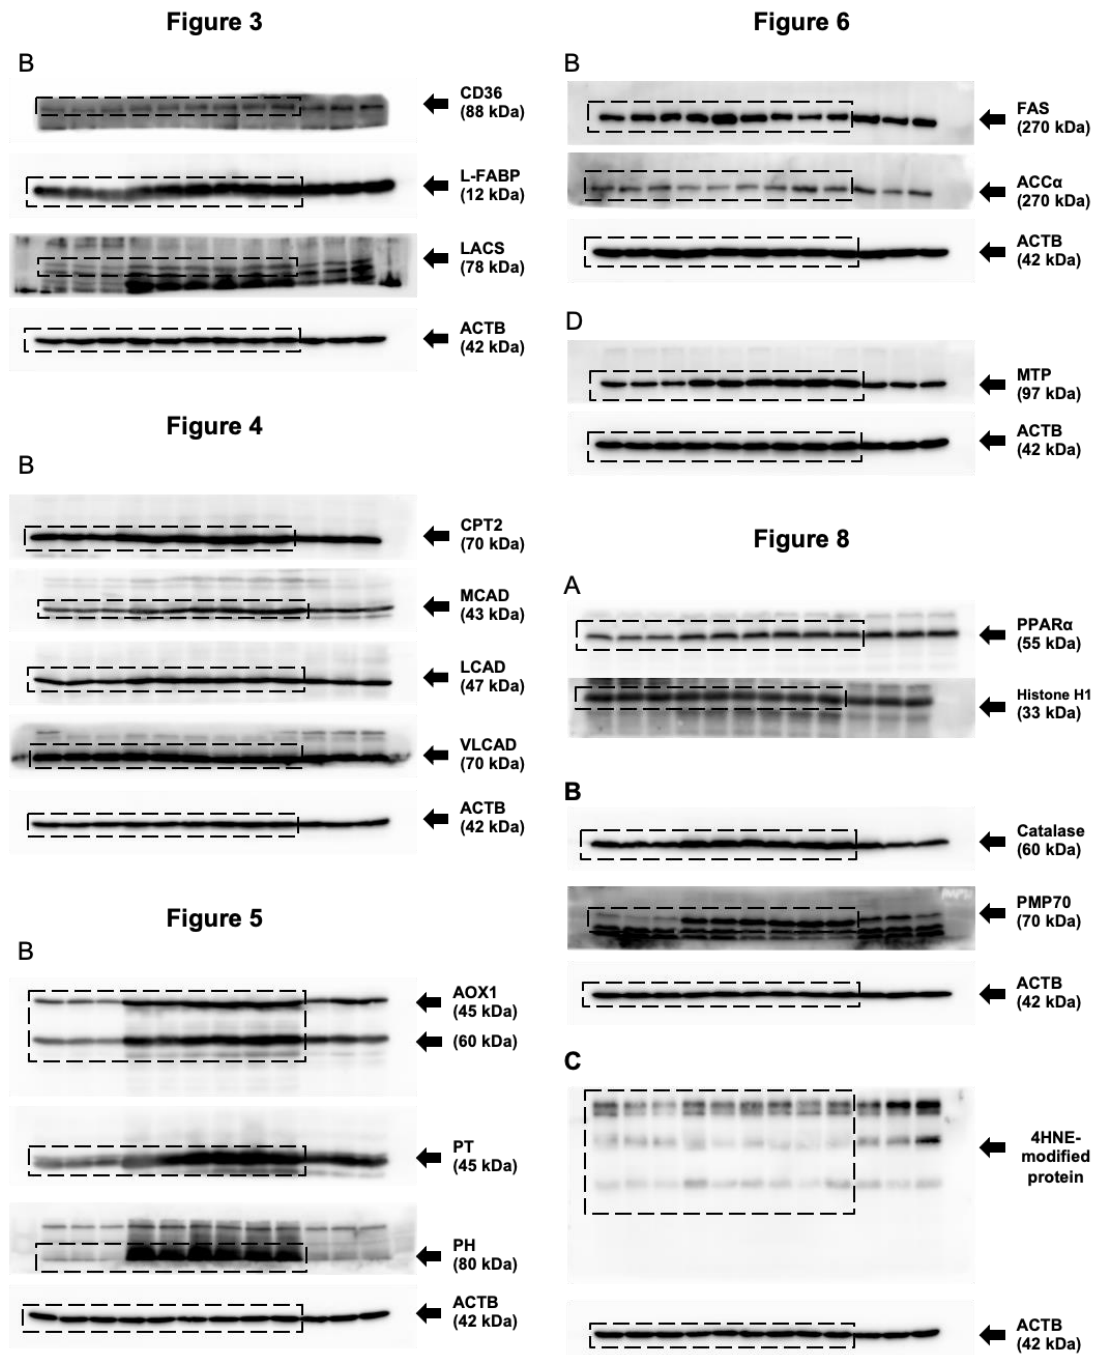

**Figure S4**

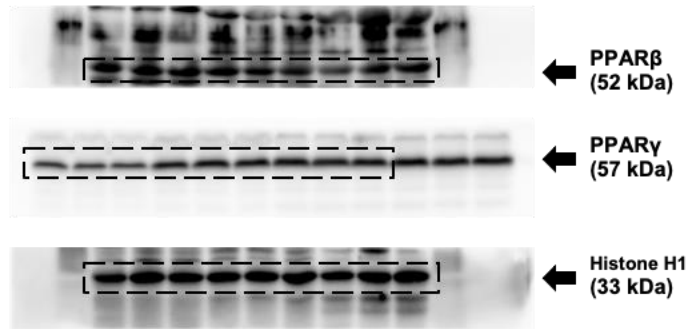

Supplement: s1 [file s1]
